# Supplementary material for: Renal Impairment with Sublethal Tubular Cell Injury in a Chronic Liver Disease Mouse Model
Source: PubMed Central journal article supplement (PMC4713438; doi:10.1371/journal.pone.0146871), 2016-01-11

S3 Fig. DDC does not induce pathological changes in glomeruli, distal tubules, and collecting ducts.

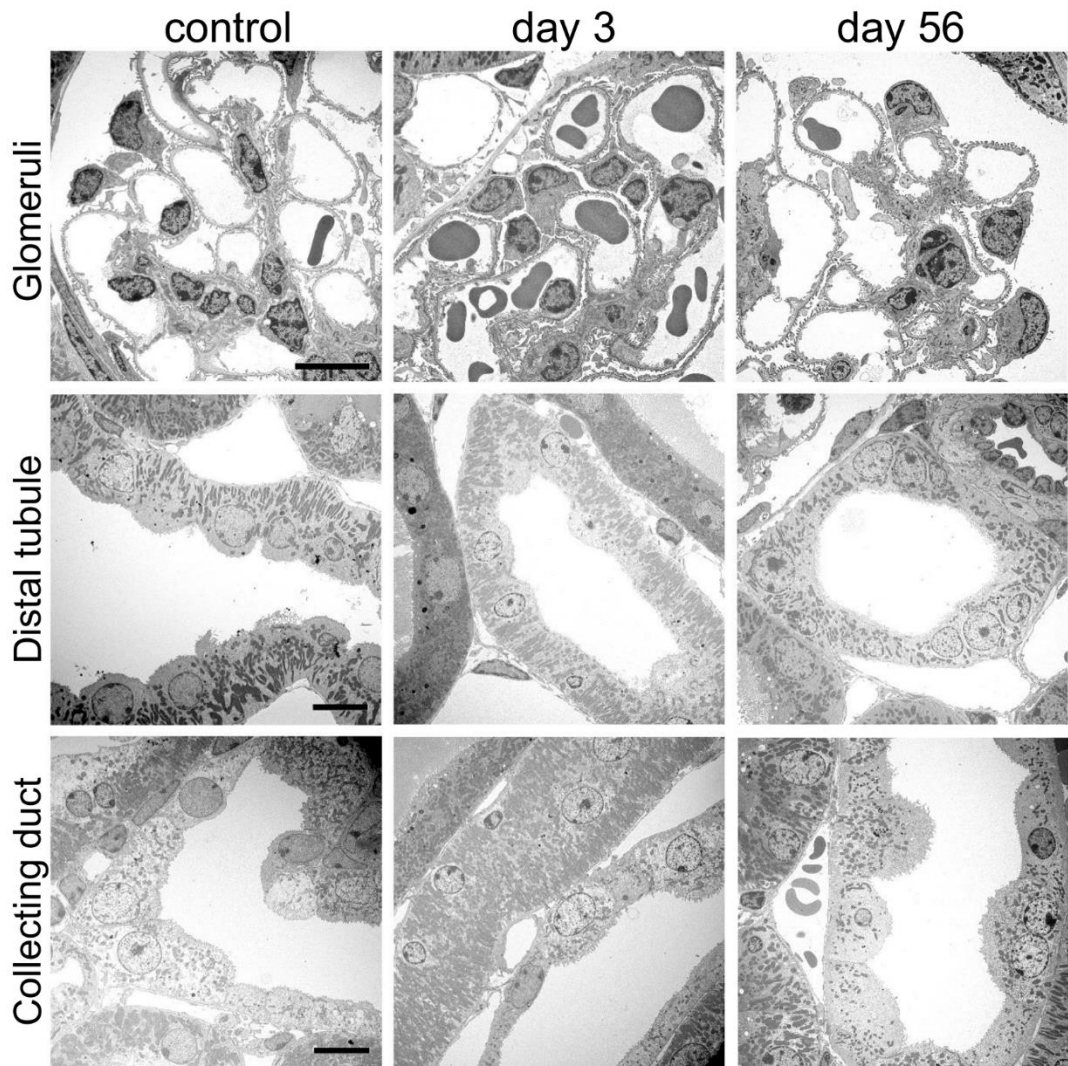

Supplement: pone.0146871.s003.pdf [file pone.0146871.s003.pdf]
