# Supplementary material for: Renal Impairment with Sublethal Tubular Cell Injury in a Chronic Liver Disease Mouse Model
Source: PubMed Central journal article supplement (PMC4713438; doi:10.1371/journal.pone.0146871), 2016-01-11

S4 Fig. DDC induces mitoses of proximal tubular cells.

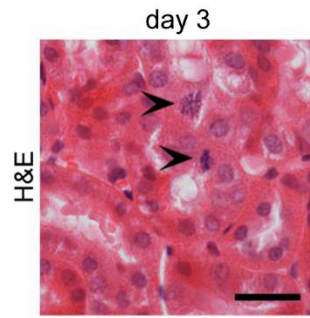

Supplement: pone.0146871.s004.pdf [file pone.0146871.s004.pdf]
